# Supplementary material for: Mesenchymal stromal cells ameliorate diabetes‐induced muscle atrophy through exosomes by enhancing AMPK/ULK1‐mediated autophagy
Source: PubMed Central journal article supplement (PMC10067482; doi:10.1002/jcsm.13177), 2023-01-27

## Supplementary Figure 1

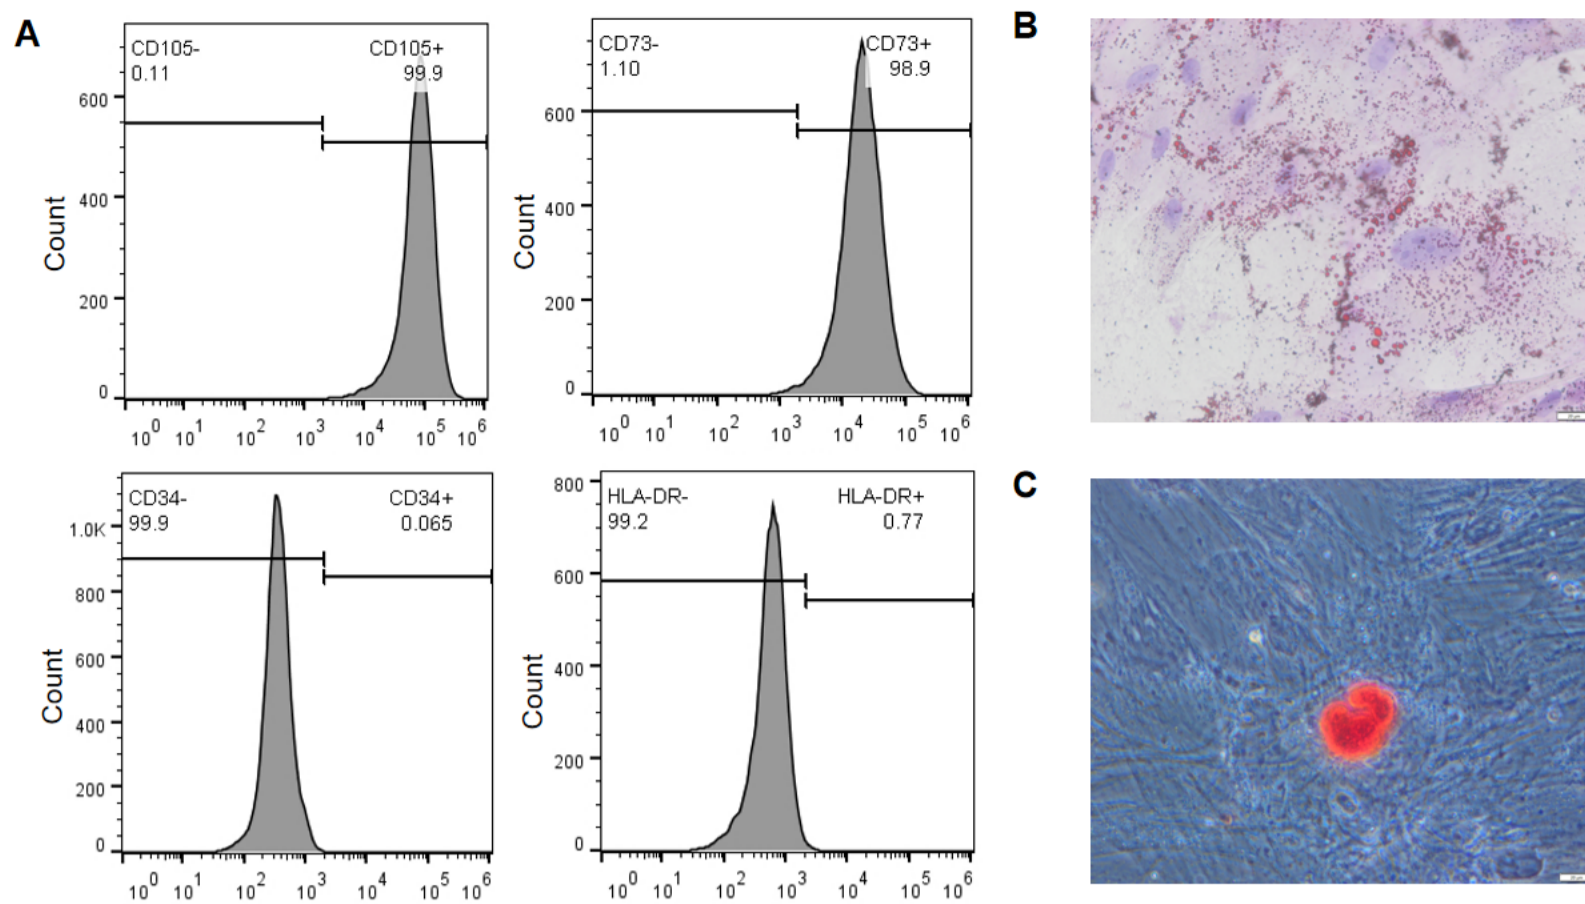

## Supplementary Figure 2

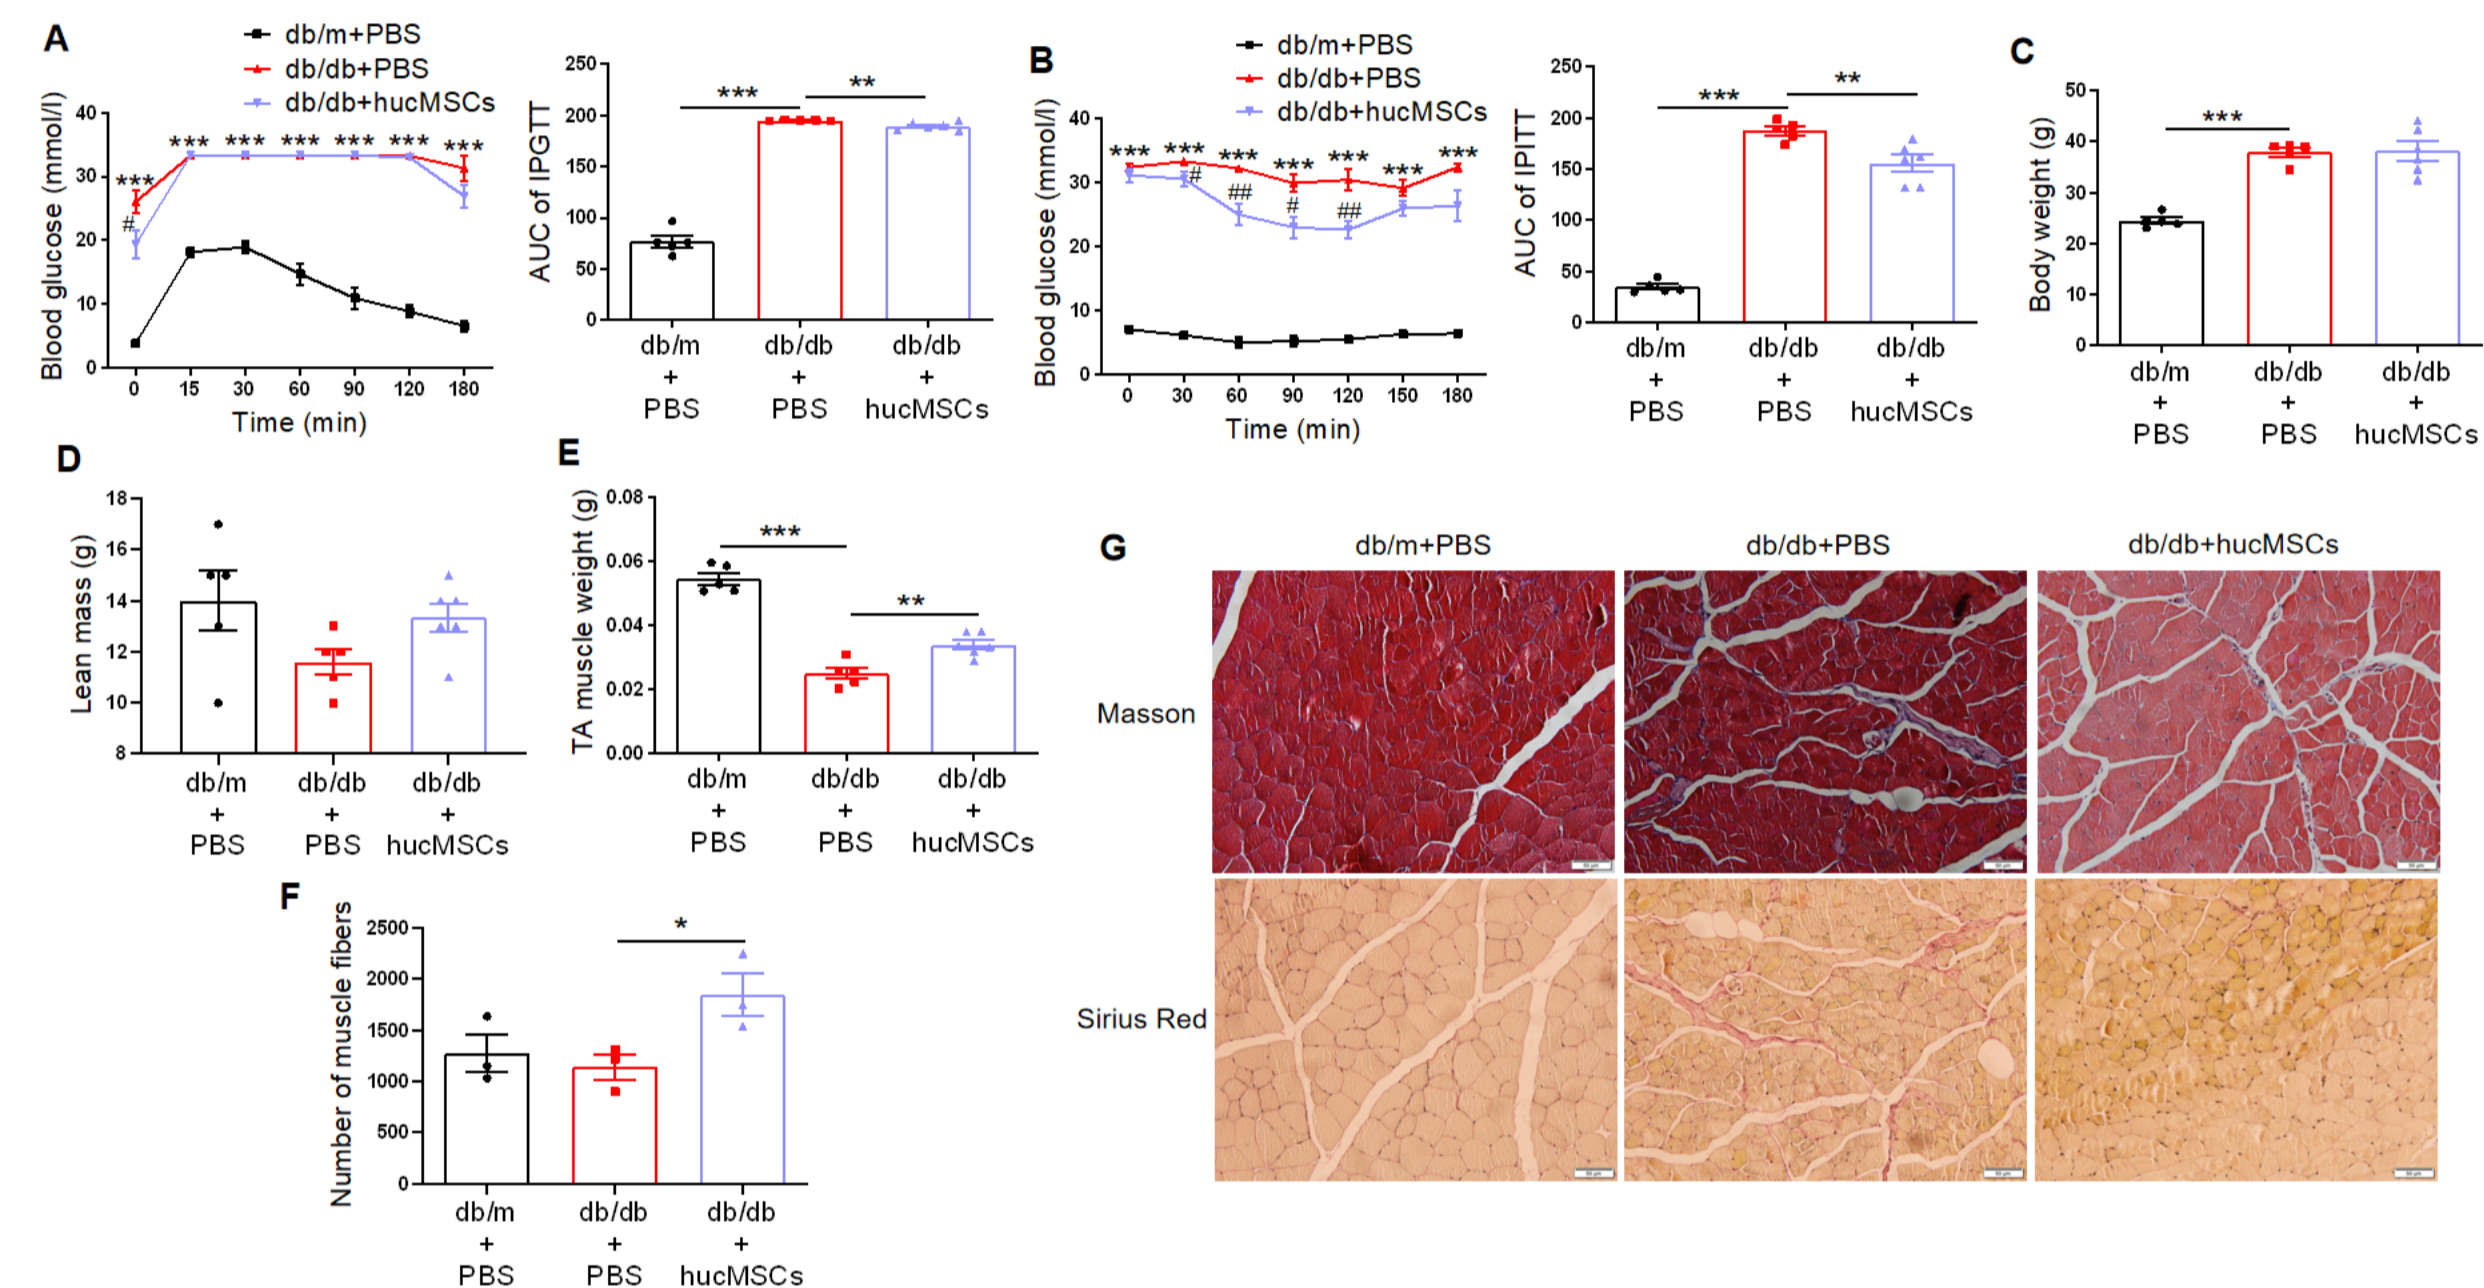

## Supplementary Figure 3

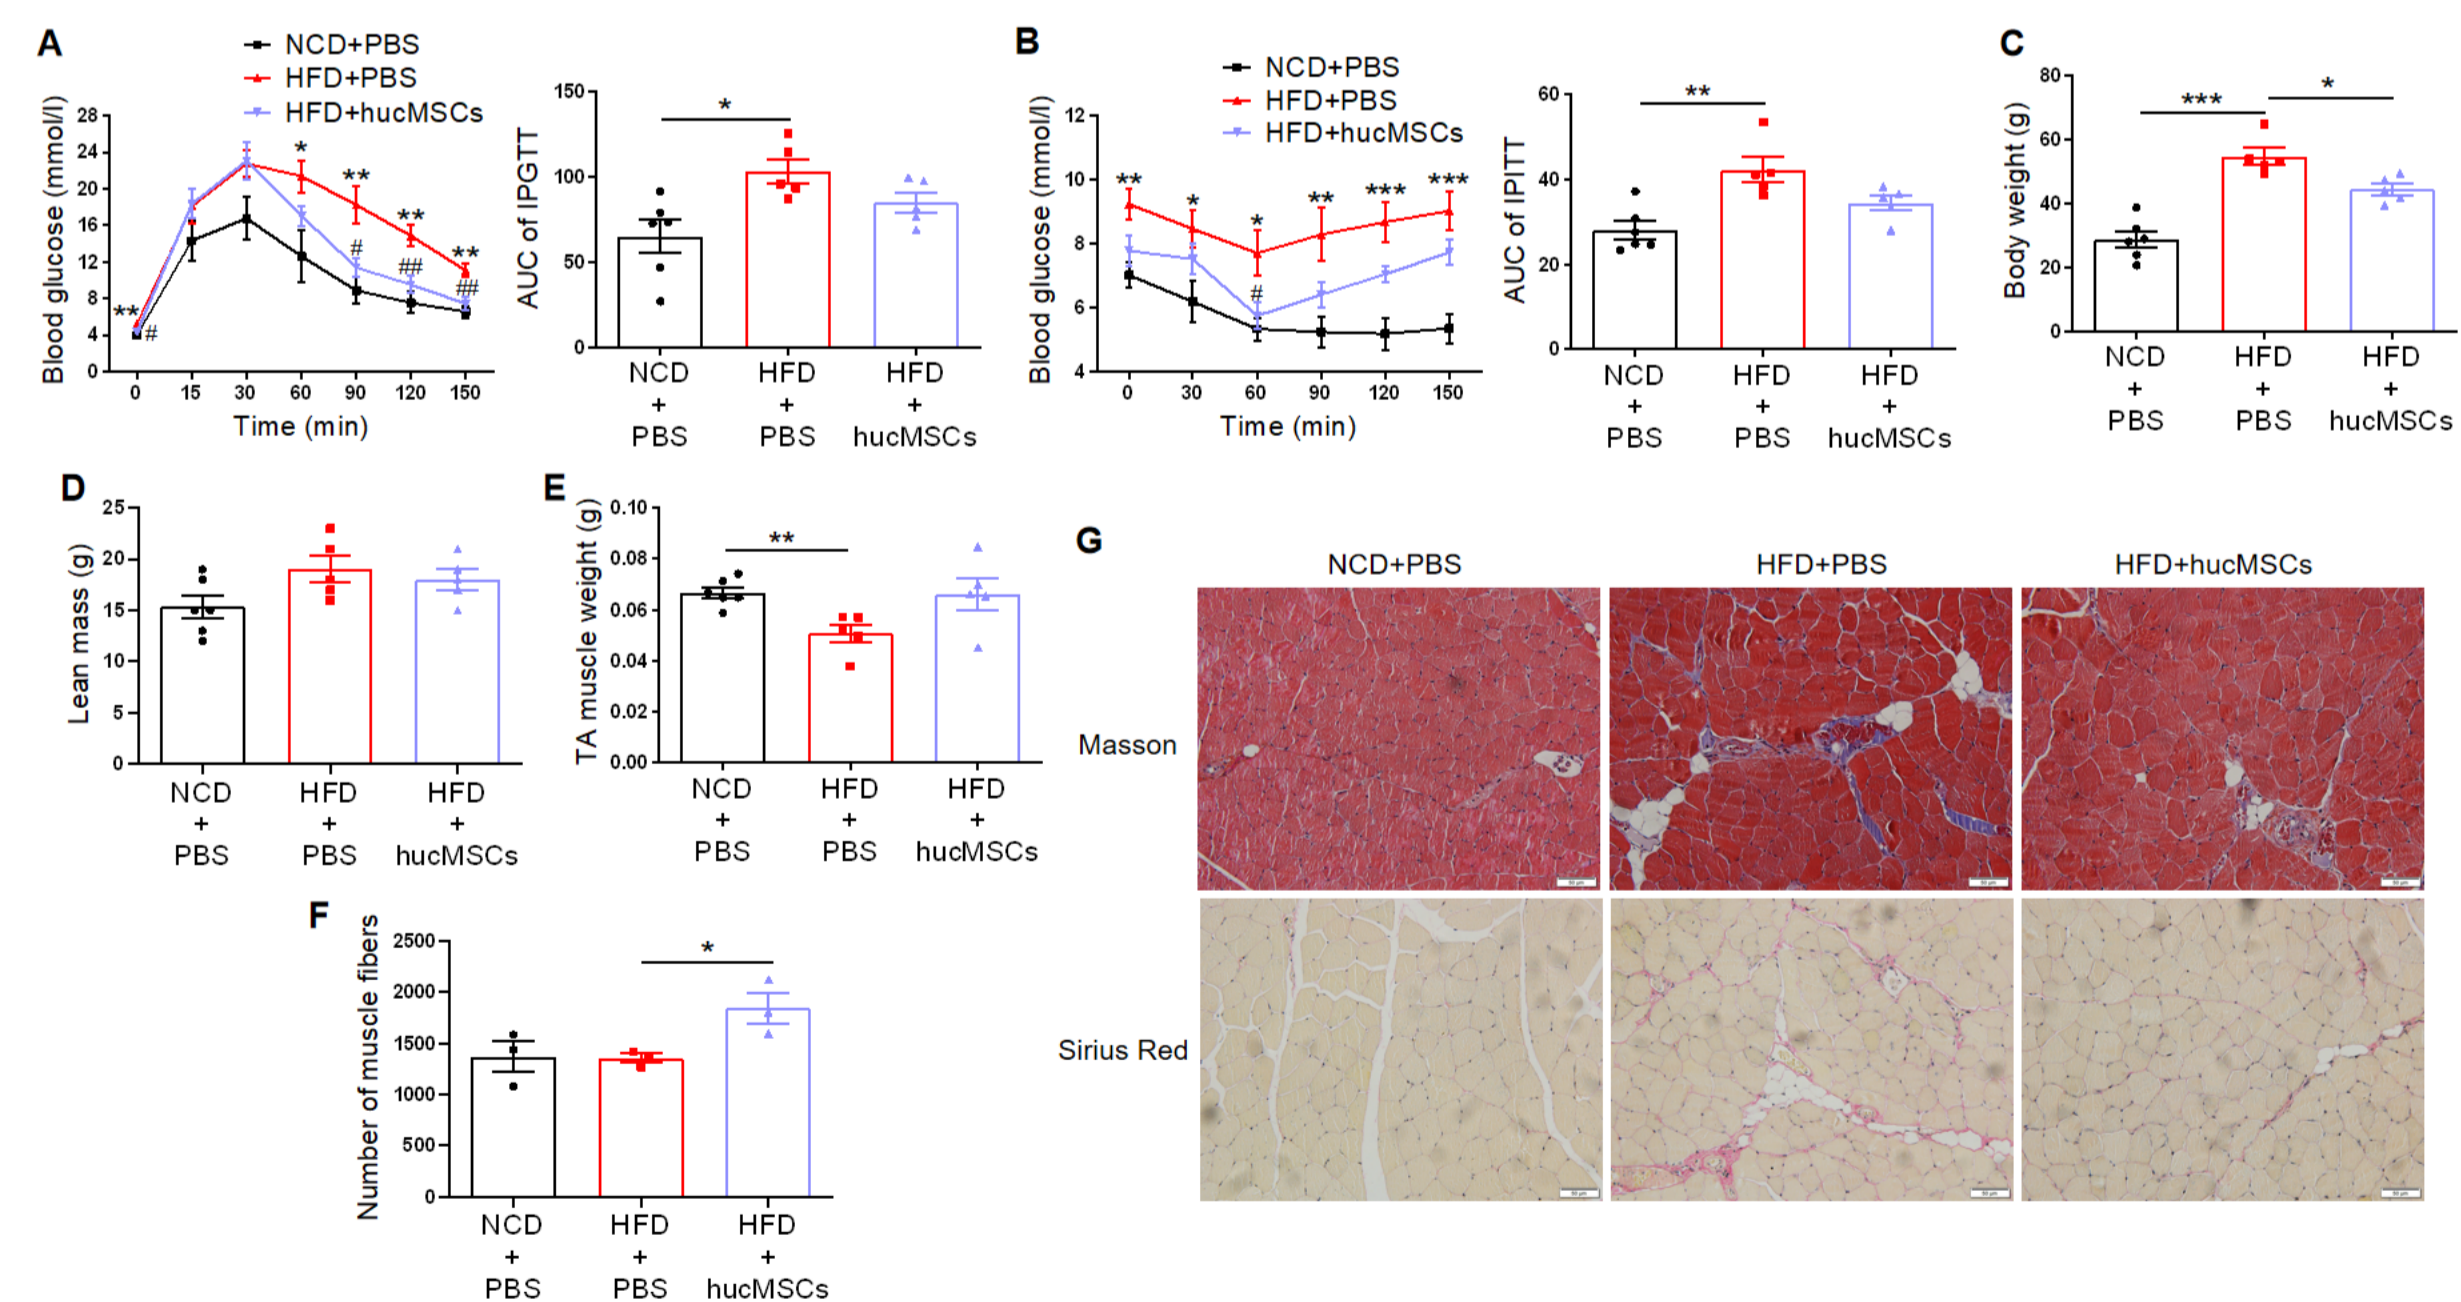

**Supplementary Figure 4**

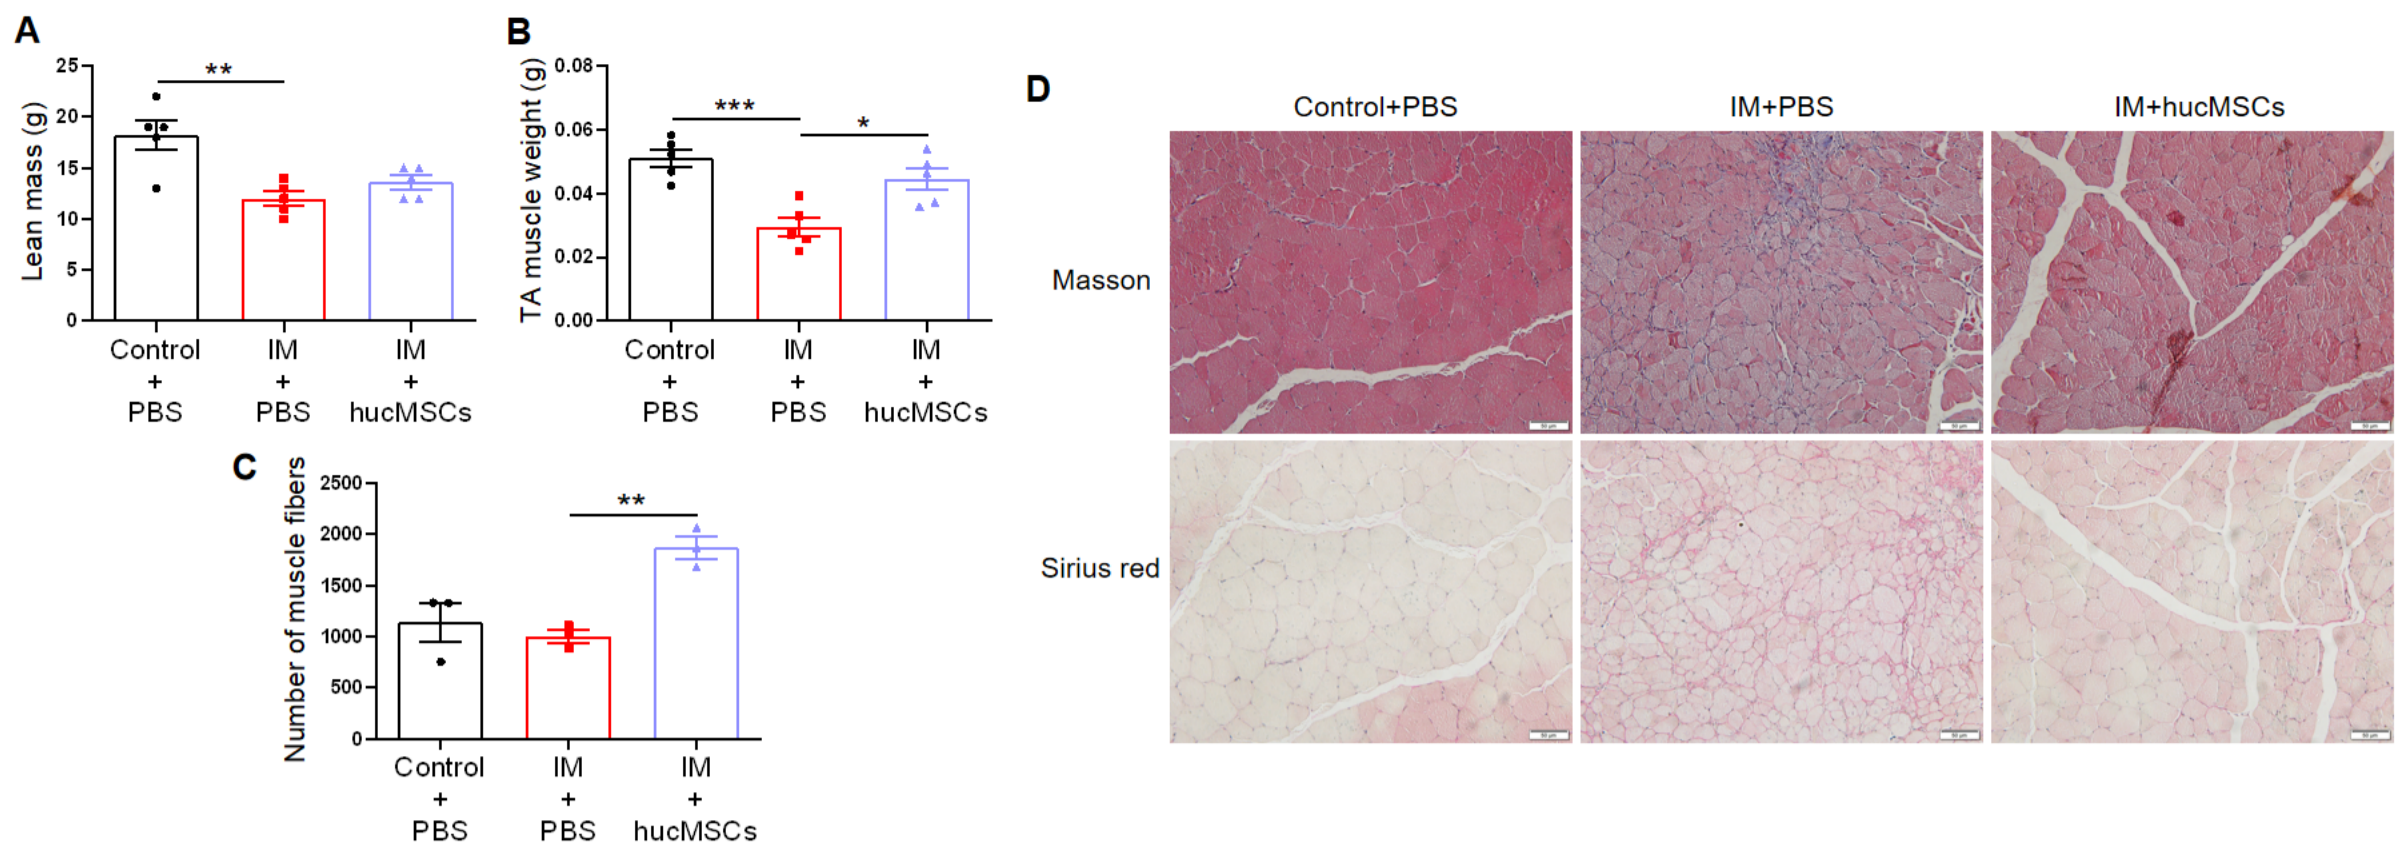

**Supplementary Figure 5**

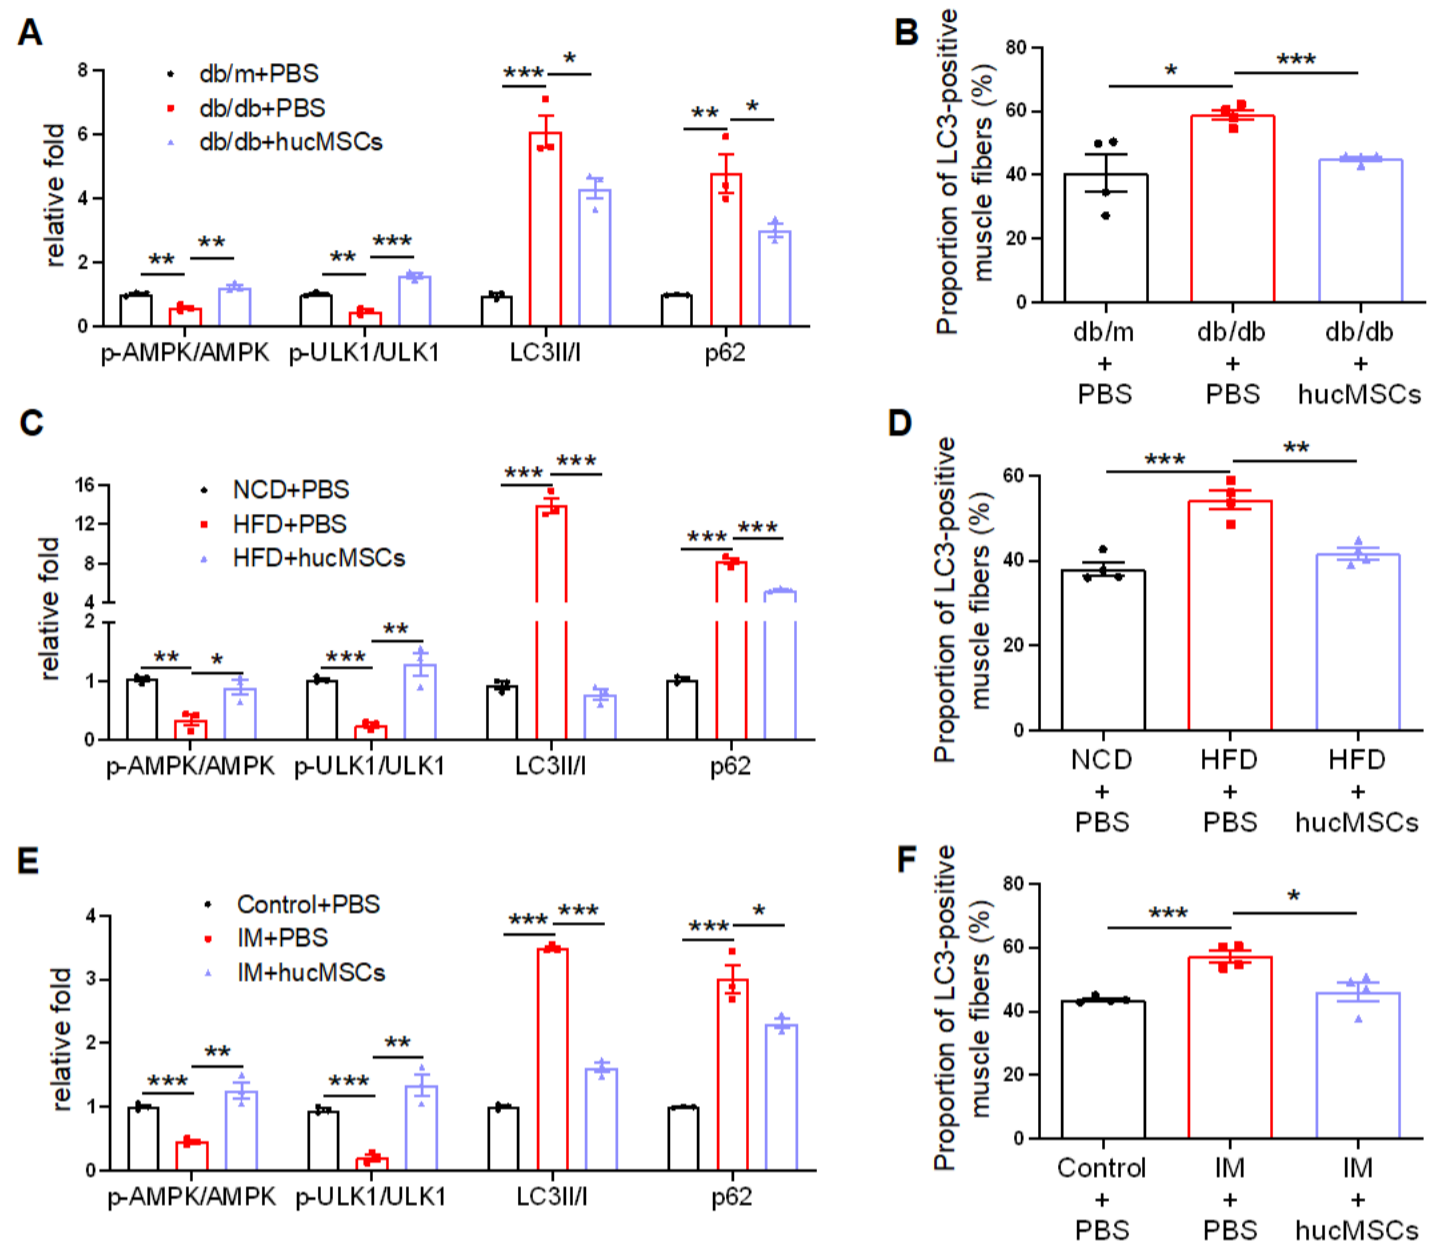

**Supplementary Figure 6**

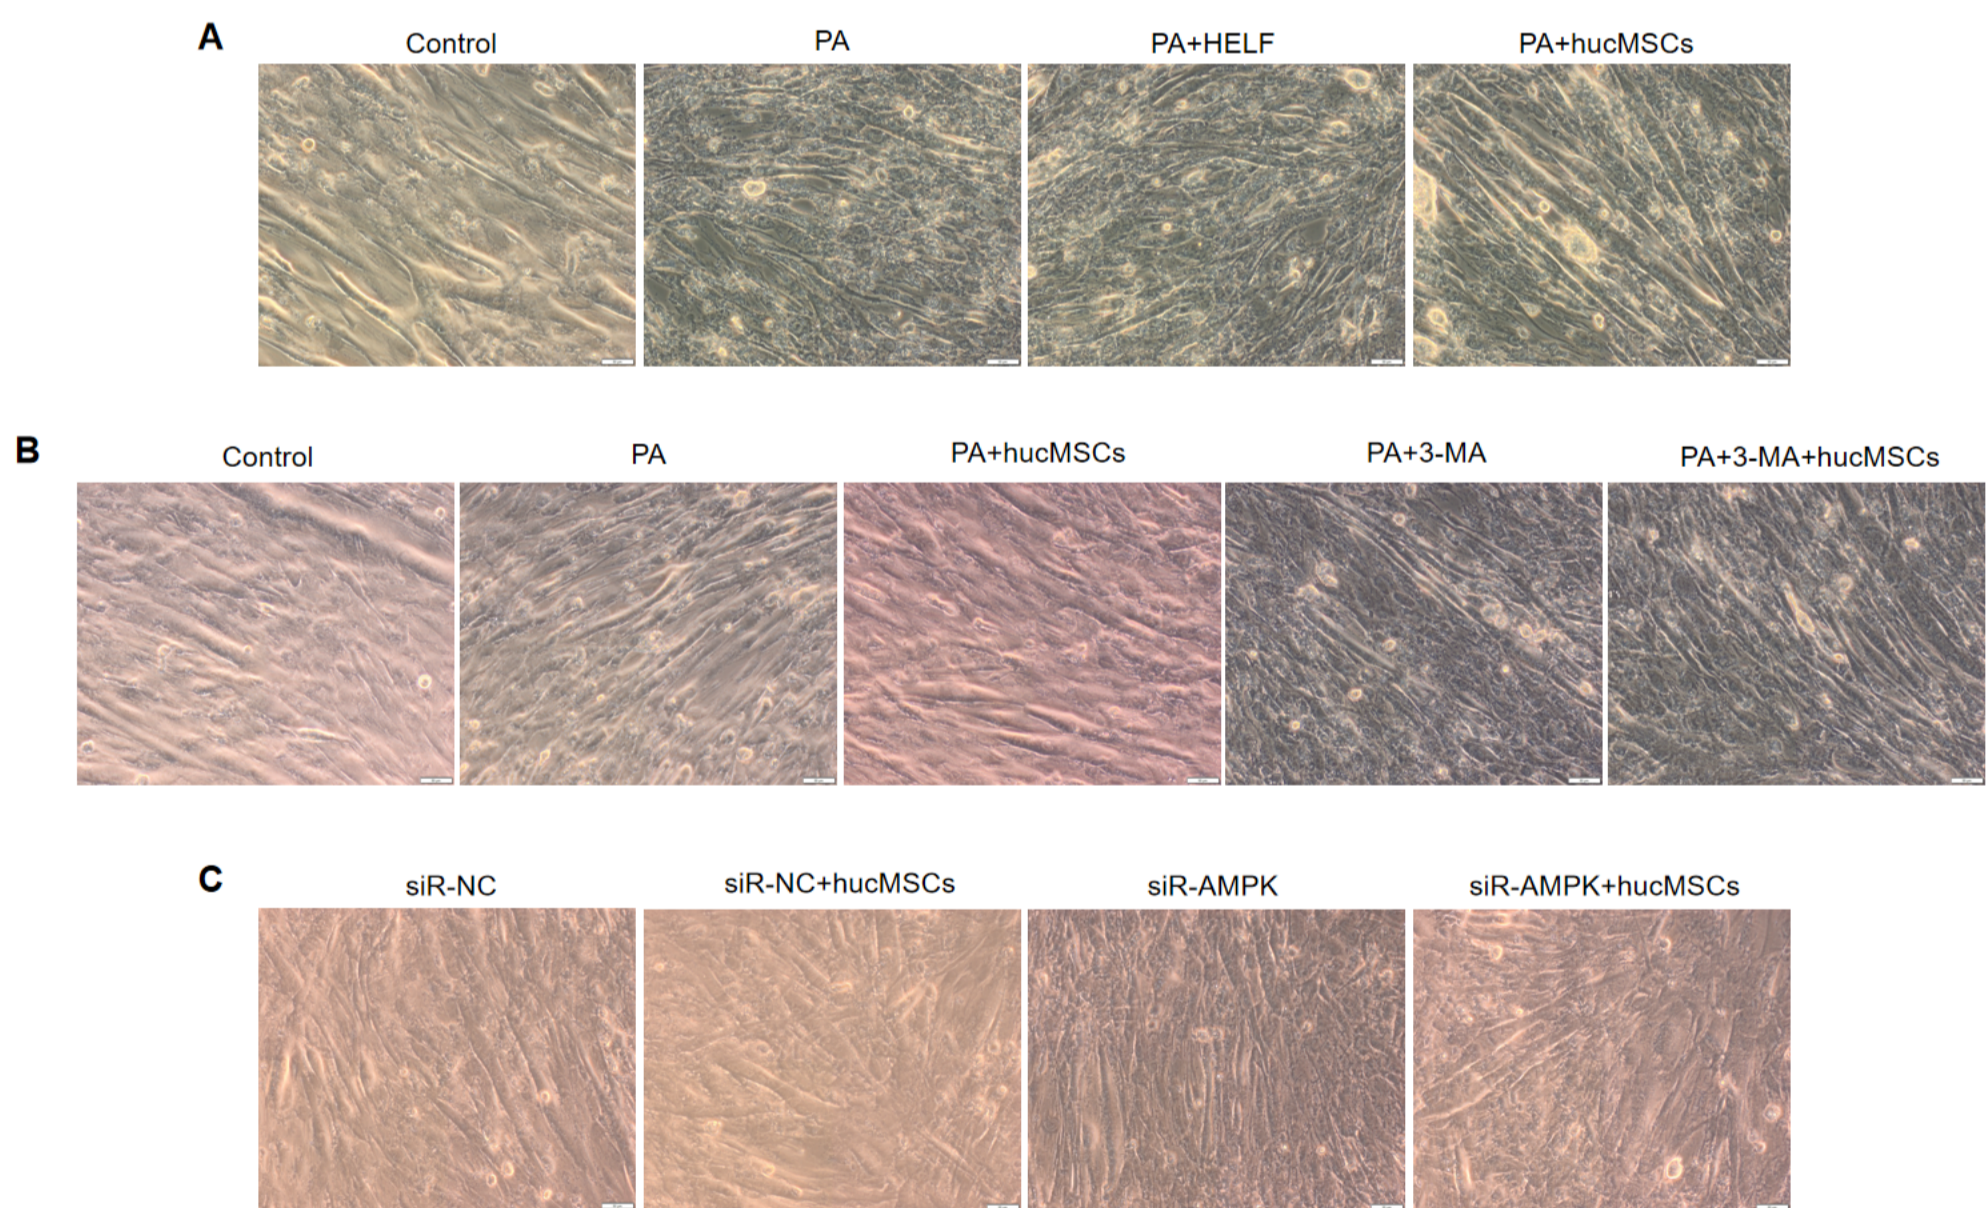

Supplementary Figure 7

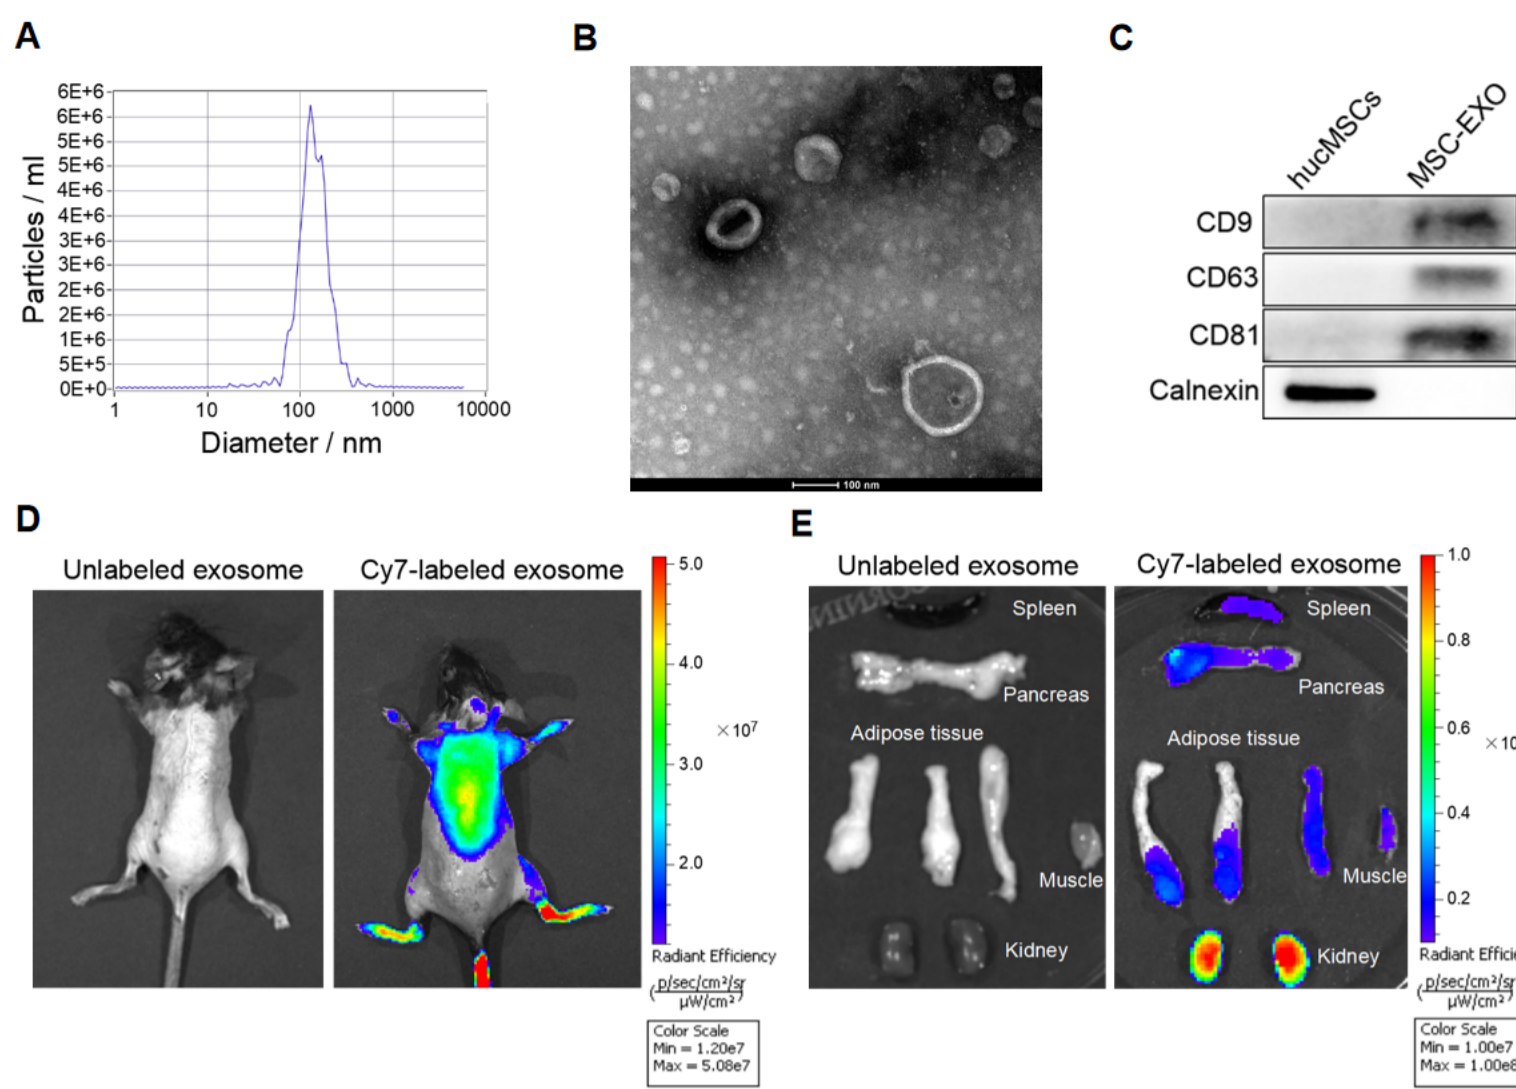

Supplementary Figure 8

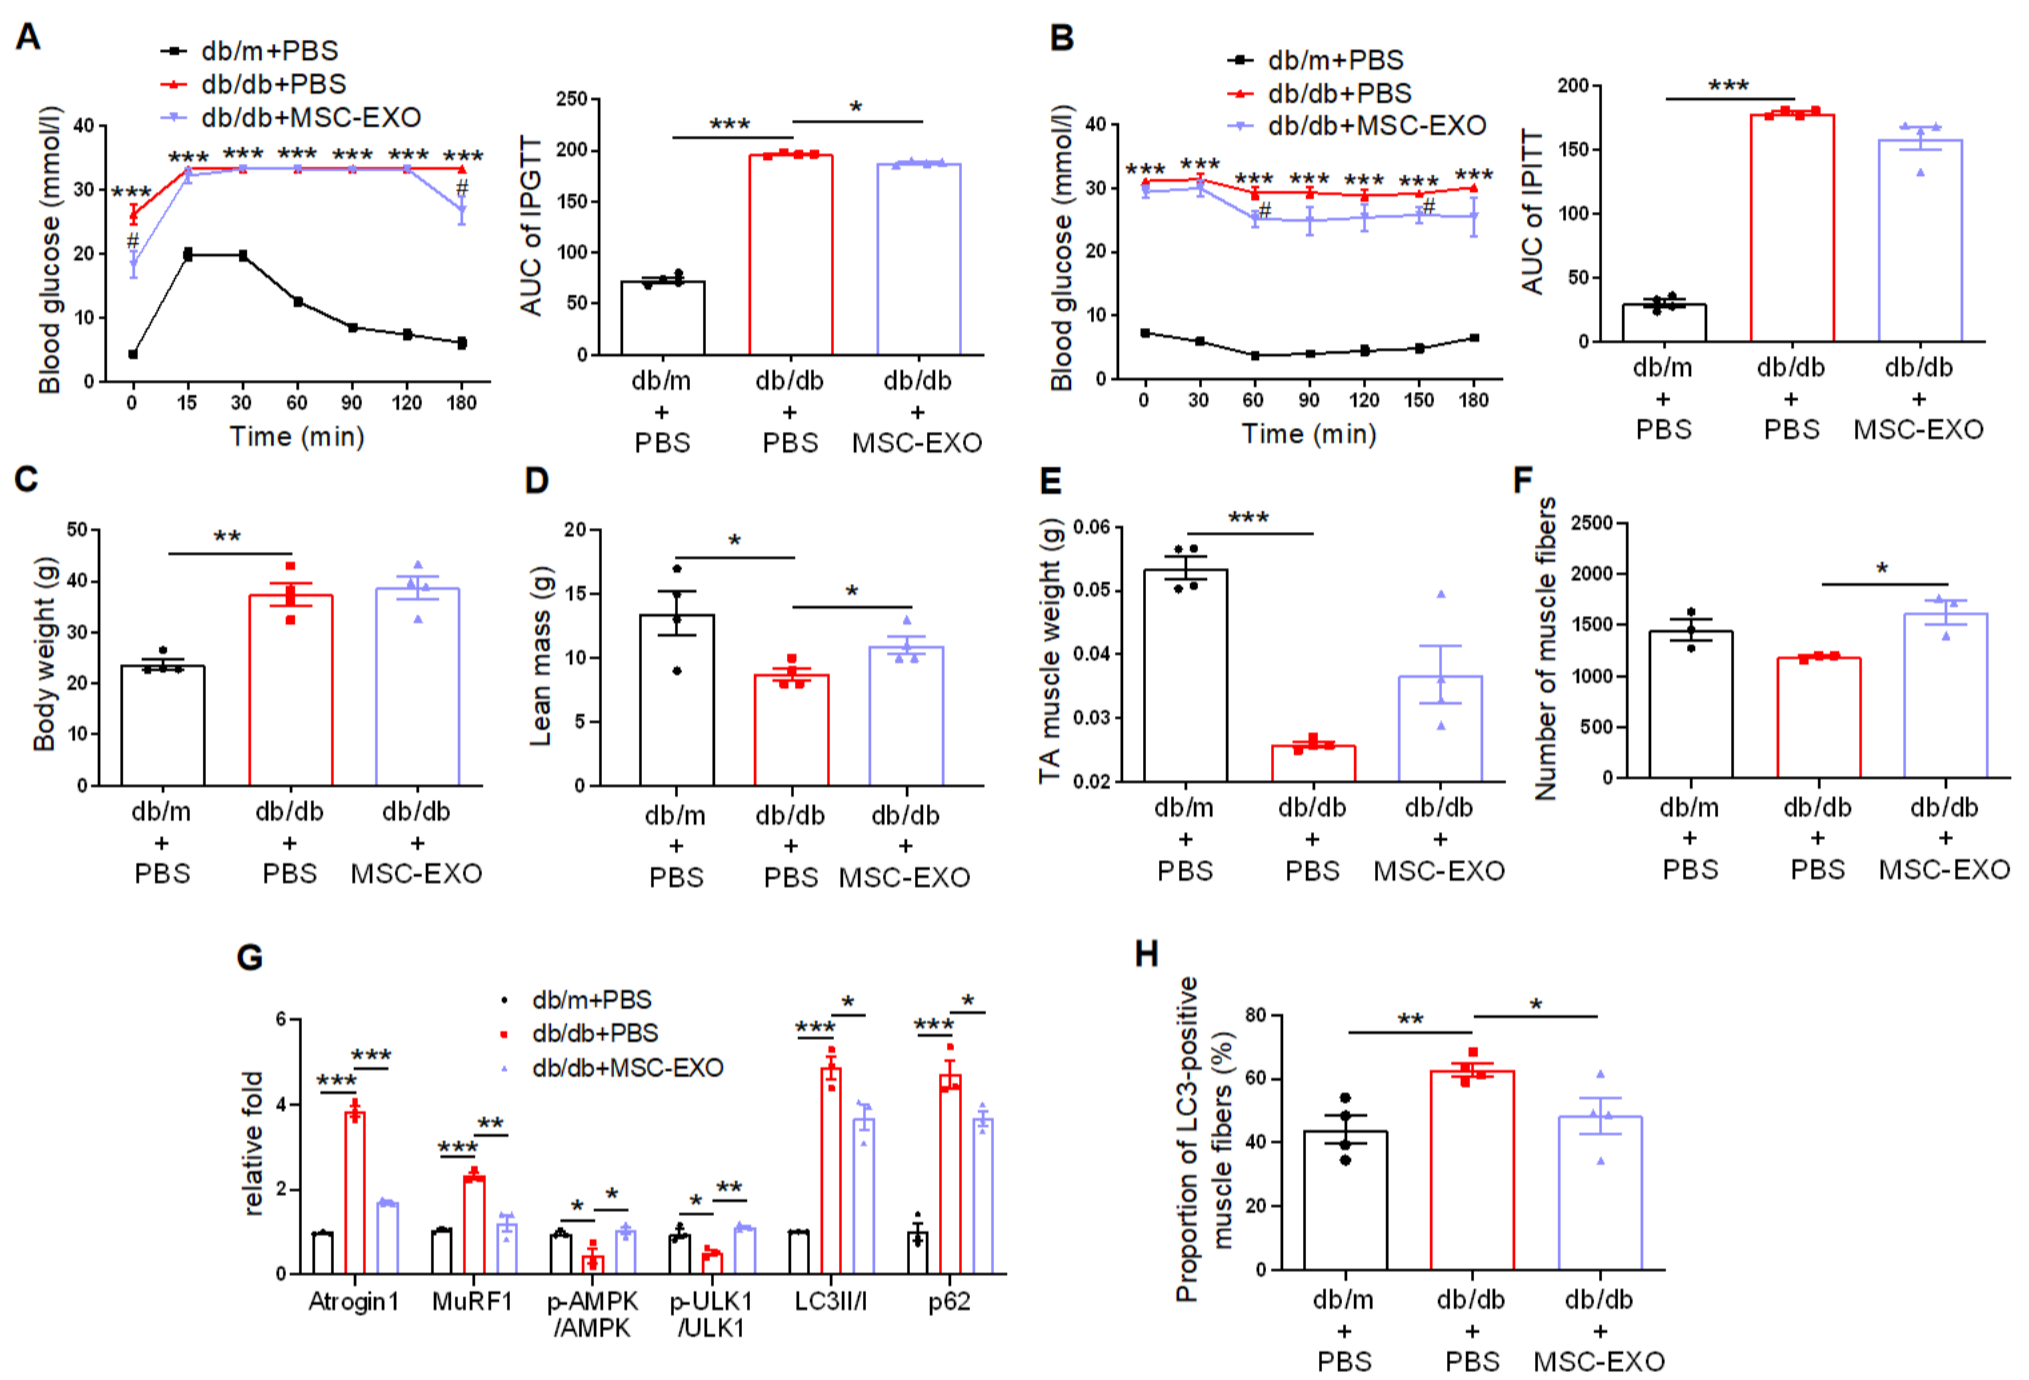

Supplementary Figure 9

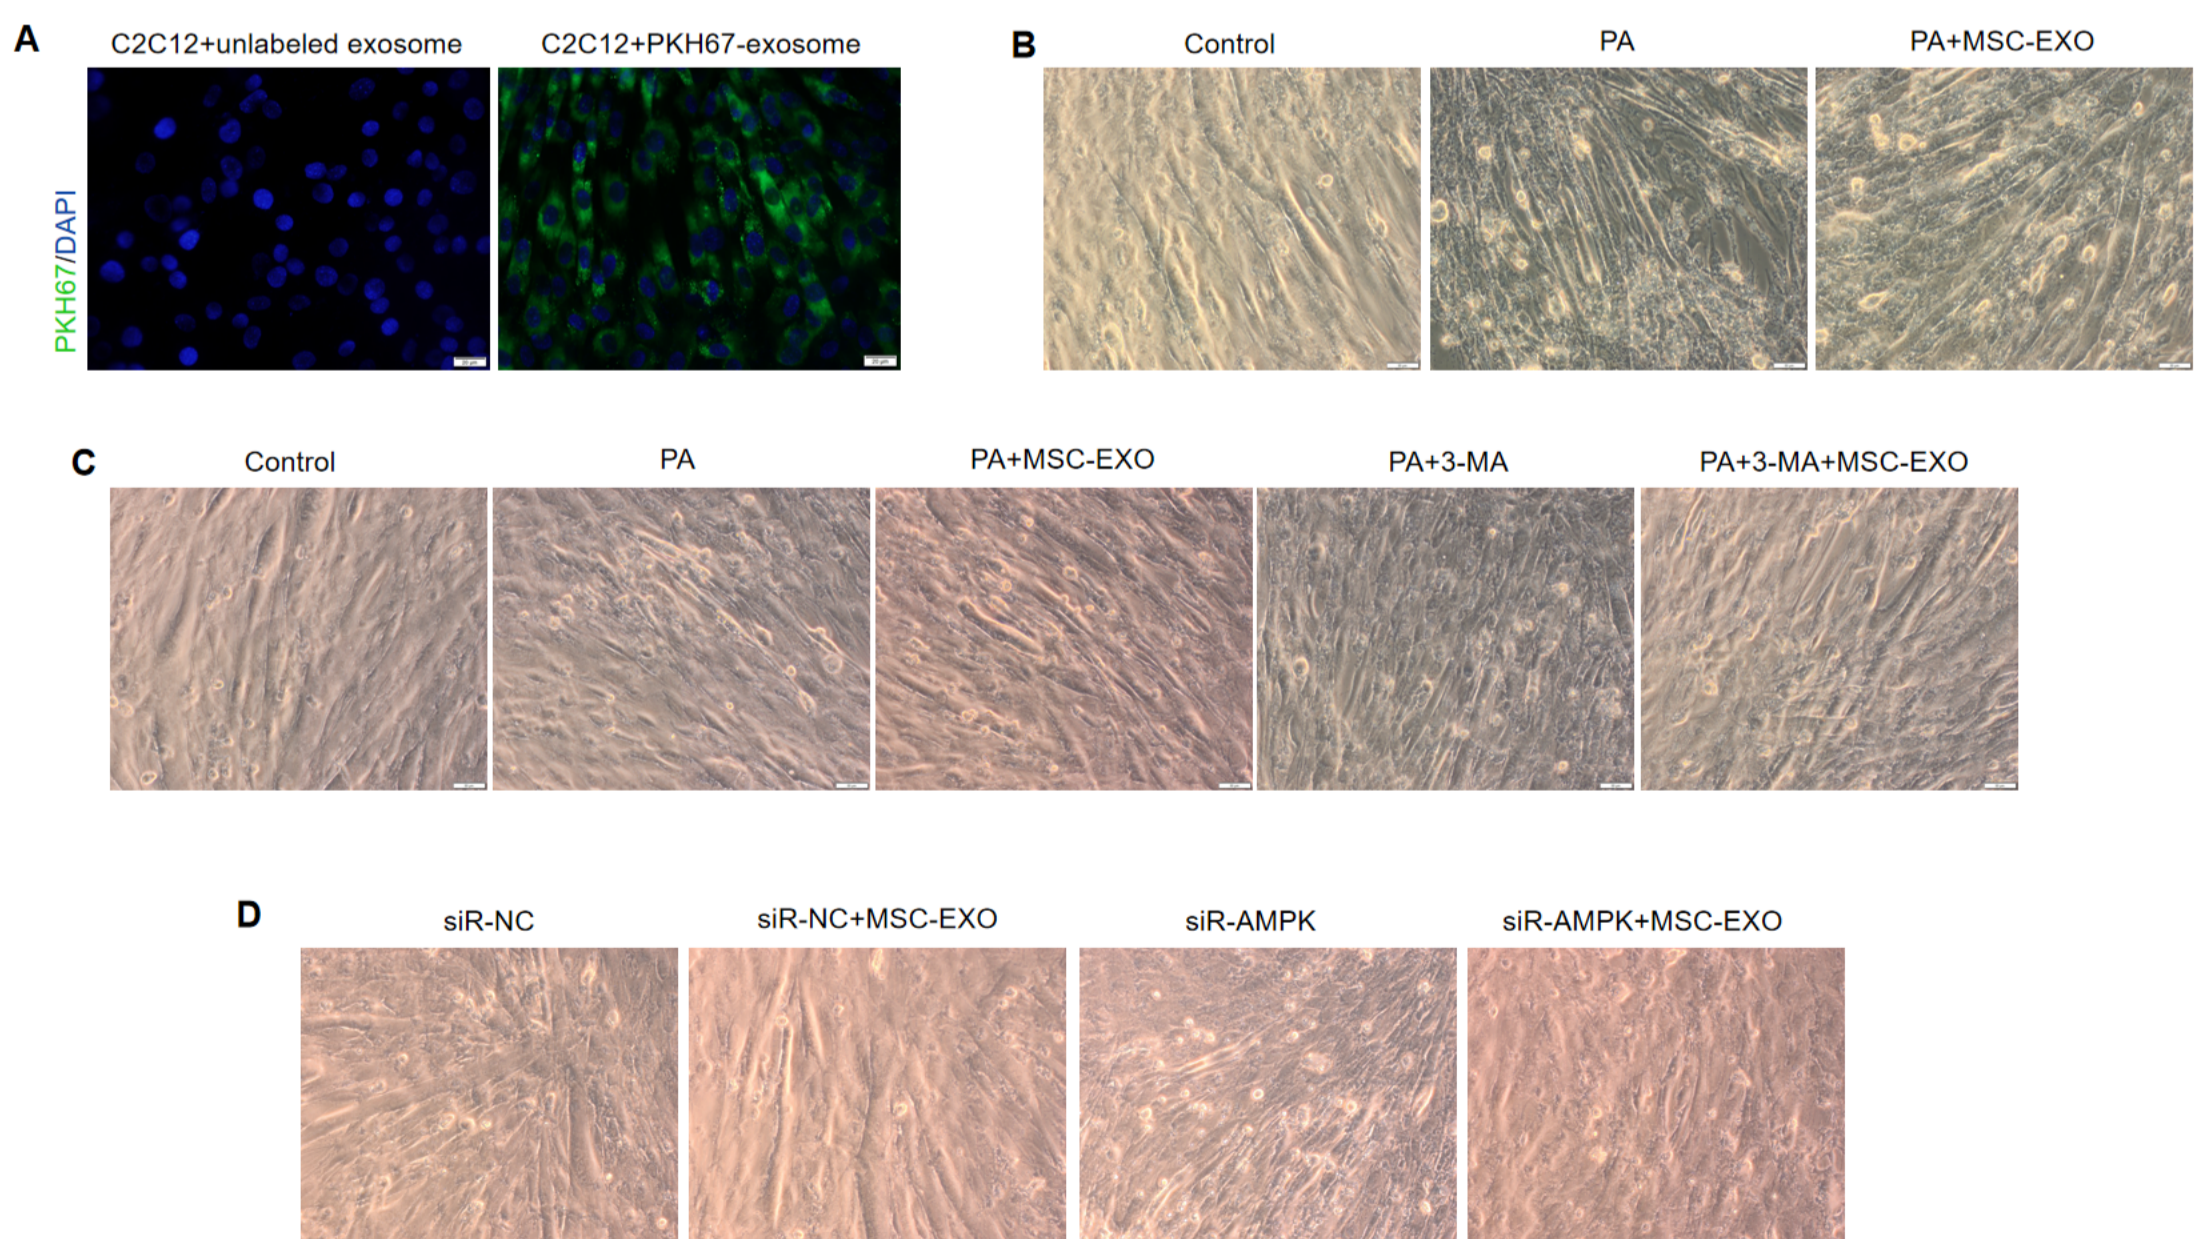

Supplement: JCSM-14-915-s001.pdf [file JCSM-14-915-s001.pdf]
